# Supplementary material for: Joint Healthcare Professional and Patient Development of Communication Tools to Improve the Standard of MS Care
Source: Springer Nature journal article supplement (doi:10.1007/s12325-019-01071-9), 2019-09-05
Supplement: MOESM2 [file 17142444]

A priority planner to identify and share  
top priorities for consultations

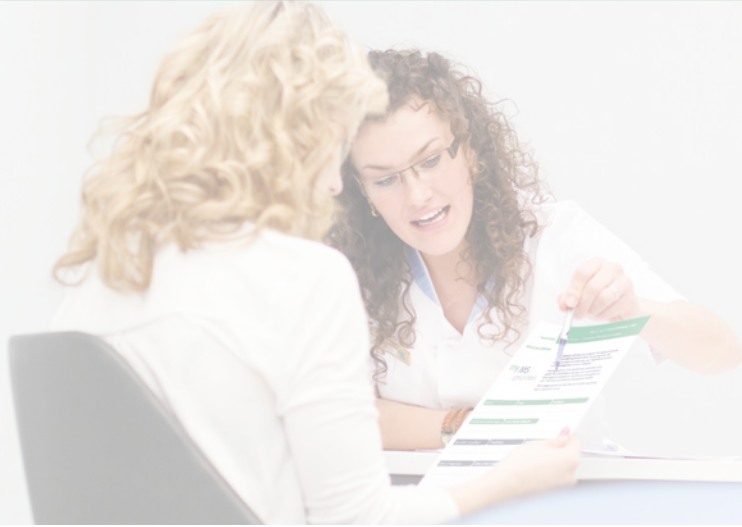

# my/MS ↑ priorities

This planner has been developed with the help and suggestions of people living with MS and MS healthcare professionals

**Name:**

**Address:**

**Neurologist/MS nurse:**

**Date of diagnosis:**

**Date of next appointment:**

**MERCK**

**MS**  
in the 21<sup>st</sup> Century

## About your planner

This planner has been designed to help you prepare for appointments with your doctor, MS nurse or other member of your healthcare team. It gives you the chance to raise your highest priorities in the management of your MS; this could be anything from treatment issues, to how MS is affecting your lifestyle.

Keep a copy of this page for your records and bring it with you to your appointment to help guide the conversation.

Remember, this is **your** planner, so feel free to include anything that is important to you.

**Use the table below to summarise your highest priorities.**

| Priority | The main things I would like to discuss at my next appointment are: |
|----------|---------------------------------------------------------------------|
| 1        |                                                                     |
| 2        |                                                                     |
| 3        |                                                                     |

**Use this section to keep track of recent tests and any results you would like to talk about.**

| Test | Results, notes and questions |
|------|------------------------------|
|      |                              |
|      |                              |
|      |                              |

## **Sending your priorities in advance allows your healthcare team to prepare for your visit and improve the use of appointment time.**

Please speak to your clinic to find out when, how, and to who you should send pages 1 to 3.

If possible, your healthcare team will add their priorities below as well. This information will then be shared with you at your appointment.

To be completed by your healthcare team:

| <b>Priority</b> | <b>Details</b> |
|-----------------|----------------|
| 1               |                |
| 2               |                |
| 3               |                |

## It's useful to record any changes you feel as time passes.

Use this section to write any comments on how your symptoms may have changed, thinking about what might be most important to discuss at your next appointment. It is important to be honest with your healthcare team about the symptoms you are experiencing.

|                                                                      | Notes |
|----------------------------------------------------------------------|-------|
| Moving and walking                                                   |       |
| Stiffness and spasms                                                 |       |
| Balance and dizziness                                                |       |
| Pain and sensation                                                   |       |
| Vision                                                               |       |
| Speech                                                               |       |
| Hearing                                                              |       |
| Bladder and bowel                                                    |       |
| Headaches                                                            |       |
| Fatigue and sleep                                                    |       |
| Moods and emotions                                                   |       |
| Concentration and memory                                             |       |
| Relationships and sexual function                                    |       |
| Infections                                                           |       |
| Other concerns e.g. <i>distance travelled to clinic or work life</i> |       |

This section (in purple) is for use at home, and does not necessarily need to be shared with your healthcare team in advance.

Provided by MS in the 21<sup>st</sup> Century | myMS priorities

**Record which medication(s) you are taking for MS, how well you feel they are working, and any problems you have experienced with your treatment plan.**

It is important to speak to your healthcare team before you consider stopping any treatment.

| Prescribed treatments for MS | Notes |
|------------------------------|-------|
|                              |       |
|                              |       |
|                              |       |

Treatment decisions and safety reporting are the responsibility of the prescribing physician.

**It is important for your doctor, MS nurse or other member of your healthcare team to know about your general health and whether you are being treated with other medication or therapies (including alternative treatments or physical therapy).**

Use this table to record other treatments you have started since your last appointment, and note any effects you have noticed on your health and MS symptoms. Include details about how you take these medicines and how often.

| Other prescribed medicines | Notes |
|----------------------------|-------|
|                            |       |
|                            |       |
|                            |       |

| Non-prescription therapies | Notes |
|----------------------------|-------|
|                            |       |
|                            |       |
|                            |       |

This section (in purple) is for use at home, and does not necessarily need to be shared with your healthcare team in advance.

Provided by MS in the 21<sup>st</sup> Century | myMS priorities

Use this section to record anything relating to your lifestyle including any changes you have made recently, and any effects you have felt on your health.

| Activity                                   | Notes |
|--------------------------------------------|-------|
| Diet                                       |       |
| Exercise                                   |       |
| Rest                                       |       |
| Work                                       |       |
| Major life events and relationship changes |       |
| Other                                      |       |

If you wish, your partner, family, friends or carers can use this section to make a note of anything they've noticed about your health, or questions they might have.

| Notes |
|-------|
|       |

This section (in purple) is for use at home, and does not necessarily need to be shared with your healthcare team in advance.

Provided by MS in the 21<sup>st</sup> Century | myMS priorities

**Use this section for any other questions you may have. This could be about clinical trials, how to make appointments, what to do if you have a relapse or anything else not covered in other sections.**

## Notes and questions

MS in the 21<sup>st</sup> Century is a Merck KGaA, Darmstadt, Germany initiative involving healthcare professionals and patient advocates.

This document is intended for personal use only and is not meant for sharing beyond the named individual's healthcare team without consent.  
If you have received this file in error, please contact the sender (if applicable) and destroy the document.

GBPSIM/NPR/0719/0192 August 2019
